# Supplementary material
Source: PubMed Central journal article supplement (PMC3277141)
Supplement: 1116776109_pnas.201116776SI.pdf [file 1116776109_pnas.201116776SI.pdf]

# Supporting Information

White et al. 10.1073/pnas.1116776109

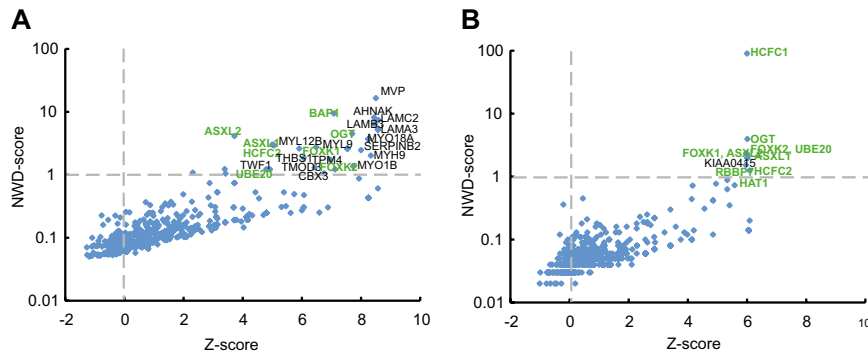

**Fig. S1.** CompPASS analysis of N/Tert-1 HA-BAP1 immunoprecipitation-MS/MS data analyzed by using a statistics table generated in 293 cells (A) or in N/Tert-1 cells (B). Green marks known BAP1 high-confidence interacting proteins as described by Sowa et al. (1). Black marks other proteins passing HCIP cutoff values. The NMD-score refers to the normalized weighted D-score, a metric that incorporates the uniqueness, abundance, and reproducibility of a given interactor.

1. Sowa ME, Bennett EJ, Gygi SP, Harper JW (2009) Defining the human deubiquitinating enzyme interaction landscape. *Cell* 138:389–403.

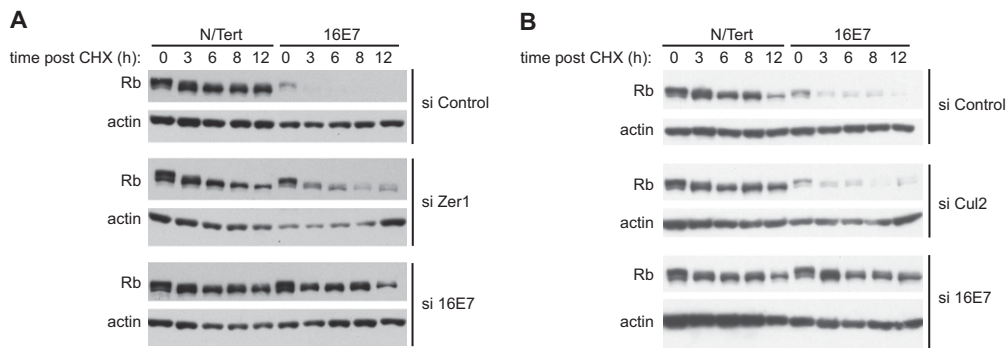

**Fig. S2.** Proteins required for the destabilization of RB1 by HPV16 E7. Control cells or N/Tert-1 cells stably expressing HPV16 E7-Flag HA were transfected with control, Zer1, and 16E7 siRNAs (A) or control, cullin 2 (Cul2), and 16E7 siRNAs (B) as indicated, then, 72 h later, treated with 40  $\mu$ g/mL cycloheximide (CHX) and harvested at the indicated time points. Lysates were separated by SDS/PAGE and Western blotted by using antibodies to RB1 and actin.

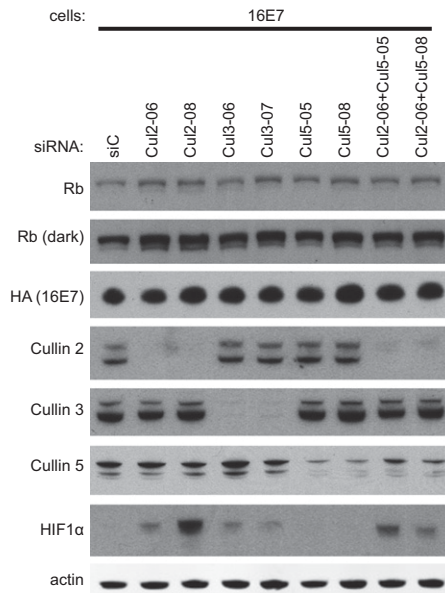

**Fig. S3.** Depletion of cullin 3 (Cul3) or cullin 5 (Cul5) does not affect RB1 levels in N/Tert-16E7 cells. N/Tert-1 cells stably expressing HPV16 E7-Flag HA were transfected with siRNAs as indicated and harvested for Western blots at 72 h after transfection. Lysates were separated by SDS/PAGE and Western blotted by using antibodies to RB1, HA, Cul2, Cul3, Cul5, HIF1 $\alpha$ , and actin.

## Other Supporting Information Files

[Dataset S1 \(XLS\)](#)

[Dataset S2 \(XLS\)](#)

[Dataset S3 \(XLS\)](#)

[Dataset S4 \(XLS\)](#)

[Dataset S5 \(XLS\)](#)

[Dataset S6 \(XLS\)](#)

[Dataset S7 \(XLS\)](#)
